# Supplementary material for: Energy transfer and tunable emission in BaSrGd4O8:Bi3+,Eu3+ phosphors for warm WLED
Source: Royal Society of Chemistry journal article supplement (doi:10.1039/d3dt03126h), 2023-01-01
Supplement: d3dt03126h1.pdf [file d3dt03126h1.pdf]

## Energy Transfer and Tunable Emission in **BaSrGd<sub>4</sub>O<sub>8</sub>:Bi<sup>3+</sup>,Eu<sup>3+</sup> Phosphors for Warm WLED**

*Shuai Wei, <sup>a, b</sup> Zeyu Lyu, <sup>b\*</sup> Dashuai Sun, <sup>b</sup> Pengcheng Luo, <sup>a, b</sup> Zheng Lu, <sup>b</sup> Luhui  
Zhou, <sup>b</sup> Mingrui He, <sup>b</sup> Sida Shen, <sup>b</sup> Hongpeng You <sup>a, b, c\*</sup>*

<sup>a</sup> Nanchang University, School of Chemistry and Chemical Engineering, Nanchang  
330031, P. R. China

<sup>b</sup> Key Laboratory of Rare Earths, Chinese Academy of Sciences; Ganjiang Innovation  
Academy, Chinese Academy of Sciences, Ganzhou 341000, P. R. China

<sup>c</sup> State Key Laboratory of Rare Earth Resource Utilization, Changchun Institute of  
Applied Chemistry, Chinese Academy of Sciences, Changchun 130022, P. R. China

\* Corresponding author. Fax: +86 431 85698041. E-mail address: hpyou@ciac.ac.cn  
(H.P. You), zylyu@gia.cas.cn (Z.Y. Lyu).

## Supplementary Notes

### Supplementary Notes 1:

The critical distance ( $R_c$ ) between the nearest  $\text{Bi}^{3+}$  ions in this phosphor be approximated by the following formula:

$$R_c \approx 2 \left[ \frac{3V}{4\pi X_c N} \right]^{\frac{1}{3}}$$

Where  $V$  is the unit cell volume,  $X_c$  refers to the critical concentration of the activating ions, and  $N$  stands for the number of total  $\text{Bi}^{3+}$  sites in the unit cell. As for this phosphor,  $V = 440.446 \text{ \AA}^3$ ,  $X_c = 0.02$ , and  $N = 8$ , and the value of  $R_c$  can be calculated to be  $17.39 \text{ \AA}$ . As for the exchange interaction, the critical distance is about  $5 \text{ \AA}$ , which is much smaller than that of  $\text{BSGO}:\text{Bi}^{3+}$ . Therefore, the energy transfer in  $\text{BSGO}:\text{Bi}^{3+}$  is via the electrical multipole interactions. On the basis of the Dexter theory, the following equation can be used to specify the interaction type:

$$\log\left(\frac{I}{x}\right) = -\frac{\theta}{3}\log x + A$$

Where  $x$  and  $I$  represent the activator ion concentration and its corresponding emission intensity, respectively.  $A$  is a constant under the same excitation condition. By analyzing the value of the parameter  $\theta$  in this equation, the energy transfer mechanism of the electric multipole interaction can be approximated. The values of  $\theta = 6, 8$  and  $10$  correspond to the electric dipole-dipole, dipole-quadrupole and quadrupole-quadrupole interactions, respectively. As shown in Figure S2, the slope of the fitted line between  $\log(I/x)$  and  $\log(x)$  is  $1.44$ . Hence, the value of  $\theta$  is  $4.32$ , which

is close to 6, indicating that the concentration quenching mechanism of Bi<sup>3+</sup>-doped BSGO phosphor is due to the dipole-dipole interaction.

### Supplementary Notes 2:

The PL decay curves were fitted using single exponential functions:

$$I = I_0 \exp\left(-\frac{t}{\tau}\right)$$

where I represent luminescence intensity, t denotes lifetime, and  $\tau$  refers to decay time for different components. The PL lifetime  $\tau$  can be calculated by the following formula:

$$\tau = \frac{\int_0^{\infty} tI(t)dt}{\int_0^{\infty} I(t)dt}$$

where  $I(t)$  is the luminescent intensity at time t. Monitored at 410 nm and 465 nm, for both sites, the decay lifetimes of 277.87 and 320.37 ns.

### Supplementary Notes 3:

The absorption efficiency ( $\xi_{abs}$ ), internal quantum efficiency (IQE), and external quantum efficiency (EQE) can be respectively calculated by the following formula:

$$\xi_{abs} = \frac{\int E_R - \int E_s}{\int E_R}$$

$$IQE = \frac{\int L_s}{\int E_R - \int E_s}$$

$$EQE = IQE \times \xi_{abs}$$

where  $\int L_s$  represents the integral area of emission spectrum,  $\int E_R$  and  $\int E_s$  represent the integral area of excitation spectrum without and with the phosphor in the integrating sphere, respectively. As shown in the Figure 2i, under 344 nm excitation, the values of IQE,  $\xi_{\text{abs}}$  and EQE of and BSGO:0.02Bi<sup>3+</sup>,1.0wt% SrF<sub>2</sub> are calculated to be 33.92%, 82.05% and 27.83%, respectively.

**Table S1.** Refined structural data of BSGO samples.

| Samples                                             | Cell parameters (Å) |        |         | Volume<br>(Å <sup>3</sup> ) | R <sub>wp</sub> , R <sub>p</sub> , (%),<br>$\chi^2$ |
|-----------------------------------------------------|---------------------|--------|---------|-----------------------------|-----------------------------------------------------|
|                                                     | a                   | b      | c       |                             |                                                     |
| BSGO                                                | 10.3400             | 3.4995 | 12.1807 | 440.754                     | 4.87, 3.87,<br>0.1726                               |
| BSGO:0.02Bi <sup>3+</sup>                           | 10.3335             | 3.4993 | 12.1806 | 440.446                     | 5.05, 4.01,<br>0.1886                               |
| BSGO:0.02Bi <sup>3+</sup> ,<br>0.04Eu <sup>3+</sup> | 10.3319             | 3.4987 | 12.1770 | 440.178                     | 5.13, 4.02,<br>0.1941                               |

**Table S2.** The atom positions, fraction factors, and thermal vibration parameters of BSGO samples.

| Formula |           | BaSrGd <sub>4</sub> O <sub>8</sub> |      |        |         |
|---------|-----------|------------------------------------|------|--------|---------|
| element | occupancy | x                                  | y    | z      | uiso    |
| Ba1     | 0.5       | 0.7514                             | 0.25 | 0.6488 | 0.01476 |
| Sr1     | 0.5       | 0.7514                             | 0.25 | 0.6488 | 0.01476 |
| Gd1     | 1         | 0.4209                             | 0.25 | 0.612  | 0.01476 |
| Gd2     | 1         | 0.4236                             | 0.25 | 0.1117 | 0.01476 |
| O1      | 1         | 0.214                              | 0.25 | 0.1707 | 0.02096 |
| O2      | 1         | 0.1215                             | 0.25 | 0.483  | 0.02096 |
| O3      | 1         | 0.505                              | 0.25 | 0.786  | 0.02096 |
| O4      | 1         | 0.43                               | 0.25 | 0.4152 | 0.02096 |

  

| Formula |           | BaSrGd <sub>4</sub> O <sub>8</sub> :0.02Bi <sup>3+</sup> |      |        |         |
|---------|-----------|----------------------------------------------------------|------|--------|---------|
| element | occupancy | x                                                        | y    | z      | uiso    |
| Ba1     | 0.5       | 0.7514                                                   | 0.25 | 0.6488 | 0.01501 |
| Sr1     | 0.5       | 0.7514                                                   | 0.25 | 0.6488 | 0.01501 |
| Gd1     | 0.98      | 0.4209                                                   | 0.25 | 0.612  | 0.01501 |
| Bi1     | 0.02      | 0.4209                                                   | 0.25 | 0.612  | 0.01501 |
| Gd2     | 0.98      | 0.4236                                                   | 0.25 | 0.1117 | 0.01501 |

|     |      |        |      |        |         |
|-----|------|--------|------|--------|---------|
| Bi2 | 0.02 | 0.4236 | 0.25 | 0.1117 | 0.01501 |
| O1  | 1    | 0.214  | 0.25 | 0.1707 | 0.02122 |
| O2  | 1    | 0.1215 | 0.25 | 0.483  | 0.02122 |
| O3  | 1    | 0.505  | 0.25 | 0.786  | 0.02122 |
| O4  | 1    | 0.43   | 0.25 | 0.4152 | 0.02122 |

| Formula |           | BaSrGd <sub>4</sub> O <sub>8</sub> :0.02Bi <sup>3+</sup> ,0.04Eu <sup>3+</sup> |      |        |         |
|---------|-----------|--------------------------------------------------------------------------------|------|--------|---------|
| element | occupancy | x                                                                              | y    | z      | uiso    |
| Ba1     | 0.5       | 0.7514                                                                         | 0.25 | 0.6488 | 0.01667 |
| Sr1     | 0.5       | 0.7514                                                                         | 0.25 | 0.6488 | 0.01667 |
| Gd1     | 0.94      | 0.4209                                                                         | 0.25 | 0.612  | 0.01667 |
| Bi1     | 0.02      | 0.4209                                                                         | 0.25 | 0.612  | 0.01667 |
| Eu1     | 0.04      | 0.4209                                                                         | 0.25 | 0.612  | 0.01667 |
| Gd2     | 0.94      | 0.4236                                                                         | 0.25 | 0.1117 | 0.01667 |
| Bi2     | 0.02      | 0.4236                                                                         | 0.25 | 0.1117 | 0.01667 |
| Eu2     | 0.04      | 0.4236                                                                         | 0.25 | 0.1117 | 0.01667 |
| O1      | 1         | 0.214                                                                          | 0.25 | 0.1707 | 0.02288 |
| O2      | 1         | 0.1215                                                                         | 0.25 | 0.483  | 0.02288 |
| O3      | 1         | 0.505                                                                          | 0.25 | 0.786  | 0.02288 |
| O4      | 1         | 0.43                                                                           | 0.25 | 0.4152 | 0.02288 |

---

| WLED | R1   | R2   | R3   | R4   | R5   | R6   | R7   | R8   | R9   | R10  | R11  | R12  | R13  | R14  | R15  |
|------|------|------|------|------|------|------|------|------|------|------|------|------|------|------|------|
| 1    | 91.9 | 99.0 | 95.5 | 94.5 | 93.3 | 95.0 | 97.3 | 98.6 | 98.4 | 95.7 | 95.0 | 95.4 | 91.5 | 95.3 | 94.3 |
| 2    | 81.3 | 91.7 | 81.8 | 75.7 | 79.6 | 81.7 | 88.1 | 97.0 | 97.2 | 92.6 | 90.8 | 90.1 | 84.3 | 90.3 | 88.4 |

---

**Table S3.** The values of R1-R15 for WLEDs.



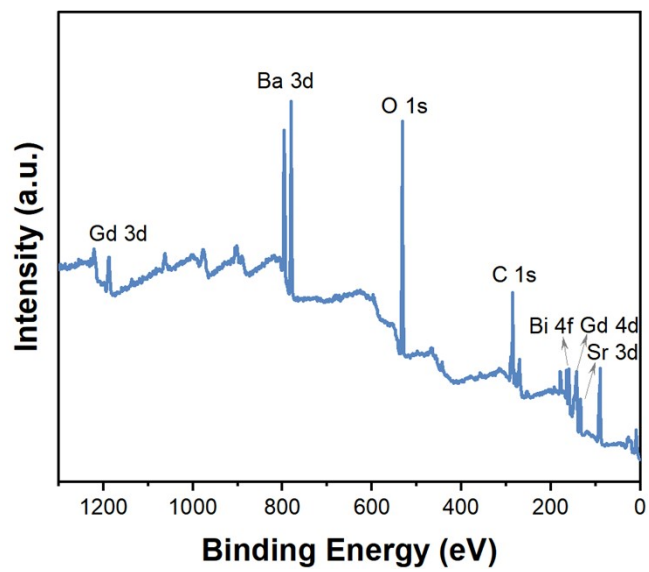

**Figure S1.** XPS spectra of the BSGO:Bi<sup>3+</sup> phosphor.

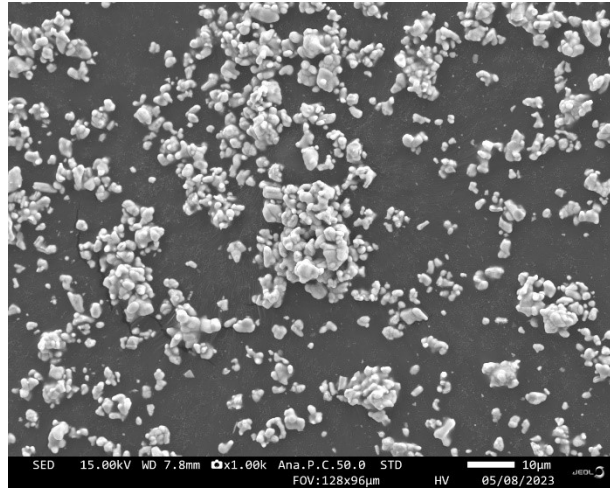

**Figure S2.** SEM image of BSGO:0.02Bi<sup>3+</sup>,0.04Eu<sup>3+</sup> phosphor.

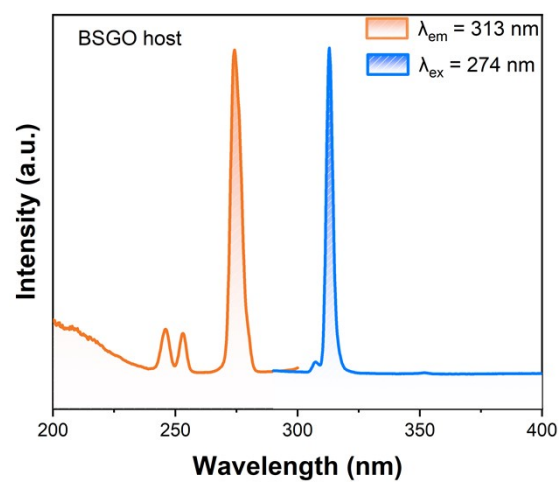

**Figure S3.** PL-PLE spectra of BSGO host.

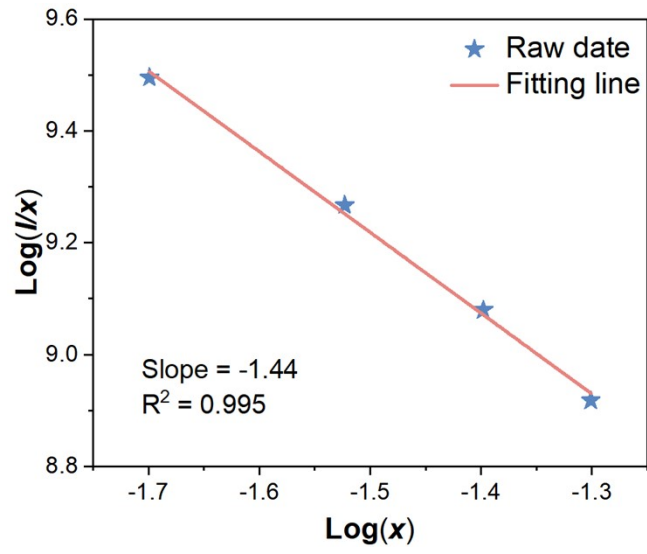

**Figure S4.** Linear relationship of  $\log(I/x)$  versus  $\log(x)$  in BSGO: $x\text{Bi}^{3+}$ .

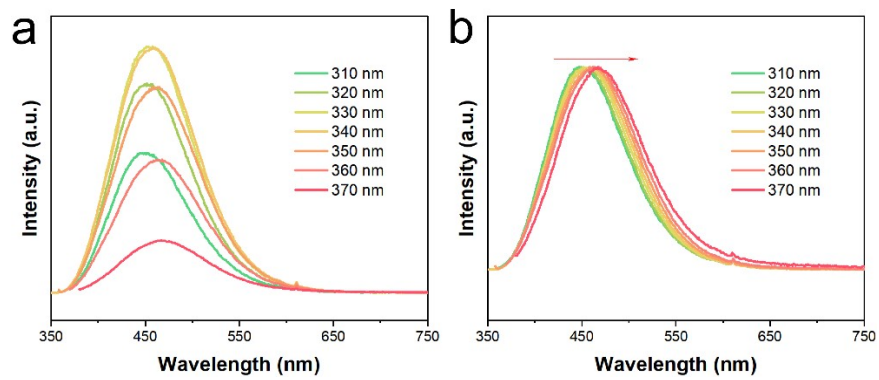

**Figure S5.** (a) PL emission spectra of BSGO:Bi<sup>3+</sup> excited at 310 nm – 370 nm. (b) Normalized PL emission spectra of BSGO:Bi<sup>3+</sup> excited at 310 nm – 370 nm.

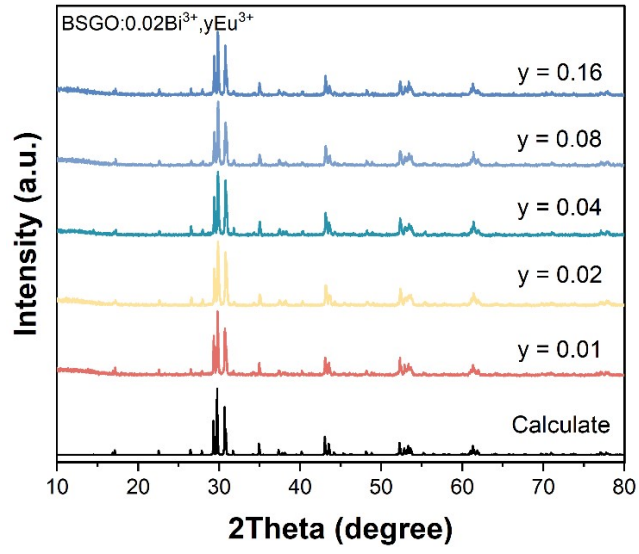

**Figure S6.** XRD patterns of the BSGO:0.02Bi<sup>3+</sup>,yEu<sup>3+</sup> (y = 0.01 – 0.16) samples.

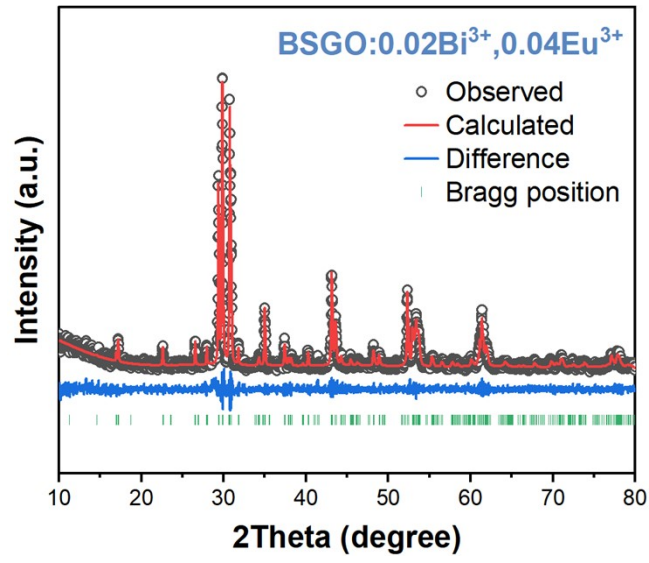

Figure S7. Rietveld refinements for BSGO:0.02Bi<sup>3+</sup>,0.04Eu<sup>3+</sup>.

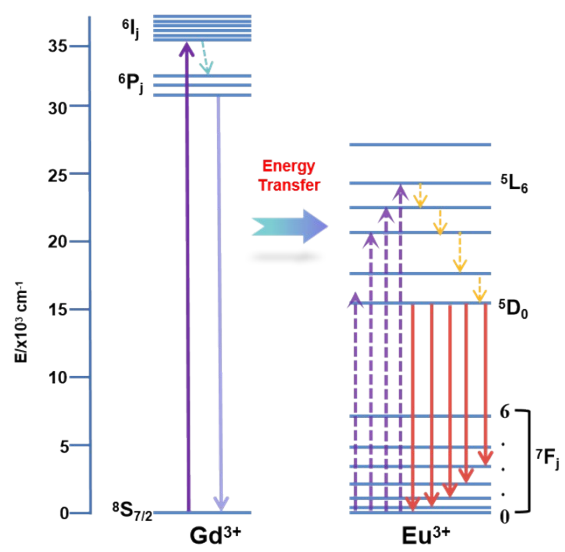

**Figure S8.** Schematic diagram of the possible energy transfer from  $\text{Gd}^{3+}$  to  $\text{Eu}^{3+}$ .



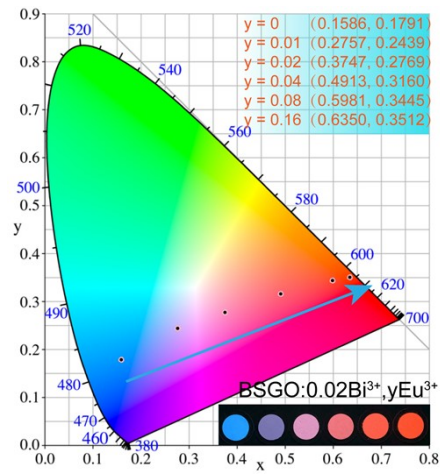

**Figure S9.** CIE chromaticity coordinates BSGO:0.02Bi<sup>3+</sup>,yEu<sup>3+</sup> (y = 0 – 0.16) phosphors and inset is a digital photo of the phosphors under the 365nm UV light.
